# Supplementary material for: Clinical trial on the efficacy and safety of NPC-15 for patients with xeroderma pigmentosum exaggerated sunburn reaction type: XP-1 study protocol for a multicentre, double-blinded, placebo-controlled, two-group crossover study followed by a long-term open study in Japan
Source: HighWire-hosted journal article supplement (doi:10.1136/bmjopen-2022-068112), 2023-03-01
Supplement: bmjopen-2022-068112supp001_data_supplement.pdf [file bmjopen-2022-068112supp001_data_supplement.pdf]

1 **Table 1.** Summary of study assessments and procedures in the crossover period

|                               | Study period     |                    |                     |                     |                     |                     |                     |                        |                    |                     |                     |                     |                     |                     |                        |  |
|-------------------------------|------------------|--------------------|---------------------|---------------------|---------------------|---------------------|---------------------|------------------------|--------------------|---------------------|---------------------|---------------------|---------------------|---------------------|------------------------|--|
|                               | Screening period | Crossover period I |                     |                     |                     |                     |                     |                        |                    | Crossover period II |                     |                     |                     |                     |                        |  |
|                               |                  | Treatment period   |                     |                     |                     |                     |                     |                        |                    | Washout             | Treatment period    |                     |                     |                     |                        |  |
|                               |                  | NPC-15 or Placebo  |                     |                     |                     |                     |                     |                        |                    |                     | Placebo or NPC-15   |                     |                     |                     |                        |  |
| Enrollment                    | All              | Day 1 <sup>1</sup> | Day 15 <sup>1</sup> | Day 16 <sup>1</sup> | Day 17 <sup>1</sup> | Day 18 <sup>1</sup> | Day 19 <sup>1</sup> | Day 22–35 <sup>2</sup> | Day 1 <sup>1</sup> | Day 15 <sup>1</sup> | Day 16 <sup>1</sup> | Day 17 <sup>1</sup> | Day 18 <sup>1</sup> | Day 19 <sup>1</sup> | Day 22–35 <sup>2</sup> |  |
| Informed Consent <sup>3</sup> | X                |                    |                     |                     |                     |                     |                     |                        |                    |                     |                     |                     |                     |                     |                        |  |
| Baseline data                 | X                |                    |                     |                     |                     |                     |                     |                        |                    |                     |                     |                     |                     |                     |                        |  |
| Enrollment                    | X                |                    |                     |                     |                     |                     |                     |                        |                    |                     |                     |                     |                     |                     |                        |  |
| Prescription                  |                  | ←————→             |                     |                     |                     |                     |                     |                        |                    |                     | ←————→              |                     |                     |                     |                        |  |
| UV irradiation <sup>4</sup>   |                  |                    | X                   |                     |                     |                     |                     |                        |                    | X                   |                     |                     |                     |                     |                        |  |
| MED <sup>4</sup>              |                  |                    |                     | X                   | X                   | X                   | X                   |                        |                    |                     | X                   | X                   | X                   | X                   |                        |  |
| Melanin index                 |                  |                    |                     |                     |                     |                     |                     |                        | X                  |                     |                     |                     |                     |                     |                        |  |

|                                                                |                |  |         |  |  |  |   |  |  |  |  |  |   |  |  |
|----------------------------------------------------------------|----------------|--|---------|--|--|--|---|--|--|--|--|--|---|--|--|
| neurological<br>severity scale<br>score <sup>5</sup>           | X              |  |         |  |  |  |   |  |  |  |  |  |   |  |  |
| hearing test <sup>6</sup>                                      | X              |  |         |  |  |  |   |  |  |  |  |  |   |  |  |
| 5-meter walk<br>test <sup>7</sup>                              | X              |  |         |  |  |  |   |  |  |  |  |  |   |  |  |
| Acute skin<br>symptom                                          | X <sup>8</sup> |  |         |  |  |  |   |  |  |  |  |  |   |  |  |
| Skin cancer                                                    | X <sup>8</sup> |  |         |  |  |  |   |  |  |  |  |  |   |  |  |
| urine test for<br>oxidative stress<br>marker <sup>9</sup>      | X              |  |         |  |  |  | X |  |  |  |  |  | X |  |  |
| Laboratory test                                                | X              |  |         |  |  |  | X |  |  |  |  |  | X |  |  |
| Secondary<br>sexual<br>characteristics<br>status <sup>10</sup> | X              |  |         |  |  |  |   |  |  |  |  |  |   |  |  |
| Adverse events                                                 |                |  | ←—————→ |  |  |  |   |  |  |  |  |  |   |  |  |



1 <sup>6</sup> Methods of hearing test (pure-tone audiometry or conditioned play audiometry) will be  
2 recorded in the medical records.

3 <sup>7</sup> The 5-meter walk test will be conducted including the patients who wear braces when the  
4 principal/participating investigator deems the patient can tolerate the test. The presence or  
5 absence of brace or the type of brace used will be recorded in the medical records. When  
6 the patient wears the brace, the tests at visit 1 and Visit 305 will be conducted using the  
7 same brace as far as possible, and if the brace is changed, the kinds of brace and the reason  
8 for the change of brace will be described in the medical records.

9 <sup>8</sup> Data will be collected within 62 weeks prior to administration of the study drug.

10 <sup>9</sup> Laboratory urine test: oxidative stress markers (Malondialdehyde,  
11 8-hydroxy-2-deoxyguanosine, Hexanoyl-Lys) and N-acetyl 5-methoxytryptamine  
12 metabolites (6-sulfatoxymelatonin).

13 <sup>10</sup> Confirmation of secondary sexual characteristics status and measurement of prolactin  
14 levels in blood. To be performed on patients between 10 and 17 years of age.

15 <sup>11</sup> Four weeks prior to the initiation of the study drug.
